# Supplementary material
Source: publisher site journal article supplement (https://www.spandidos-publications.com/165/downloadSupplementary)
Supplement: Supplementary file 1 [file downloadSupplementary]

Figure S1. Effect of the CHO treatment on the cell viability and the transfection efficiency of miR-24 in MIN6 cells. (A) MIN6 cells were treated with 2.5, 5 mM or 10 mM soluble cholesterol for 12 h, and then the cell viability was measured using the cell counting kit-8 assay. \* $P < 0.05$  vs. the 0 mM CHO-treated group; (B) Changes in the levels of the miR-24 in MIN6 cells transfected with the miR-24 mimic/inhibitor were detected using reverse transcription-quantitative PCR. \*\* $P < 0.01$  vs. the Scr-treated group, Scr, scrambled miRNA sequence; CHO, cholesterol; miR, microRNA.

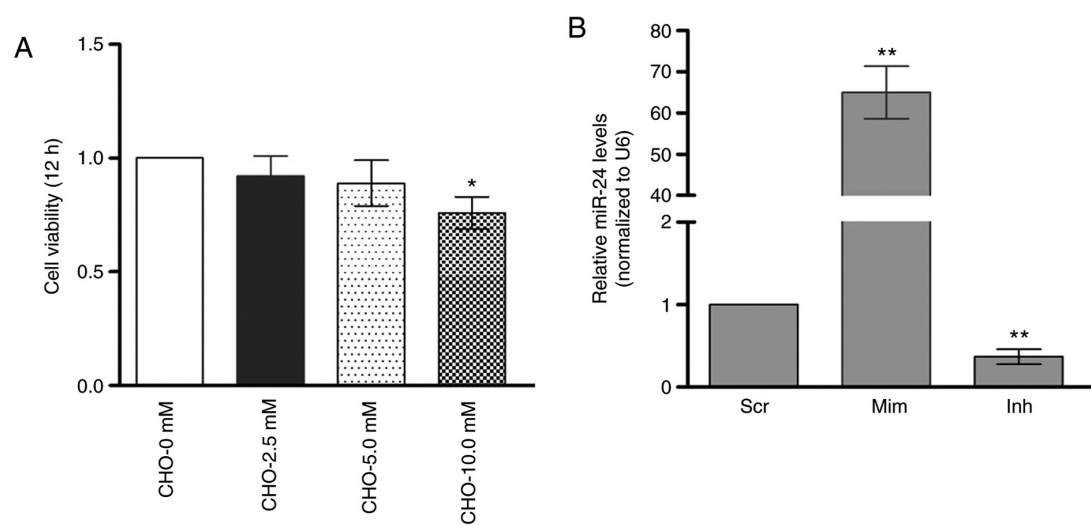

Figure S2. Direct inhibition of Sp1 function affects the levels of proteins involved in the Sp1/Scgn-FAK signaling pathway and attenuates insulin secretion in MIN6 cells. (A) A pretreatment with the Sp1 inhibitor MMA decreased the levels of the Scgn, p-FAK and p-paxillin proteins. (B) MMA pretreatment significantly attenuated GSIS in MIN6 cells. \*\*P<0.01 vs. the control. MMA, mithramycin A; p-FAK, phosphorylated-focal adhesion kinase; Scgn, secretagogin; MMA, mithramycin A.

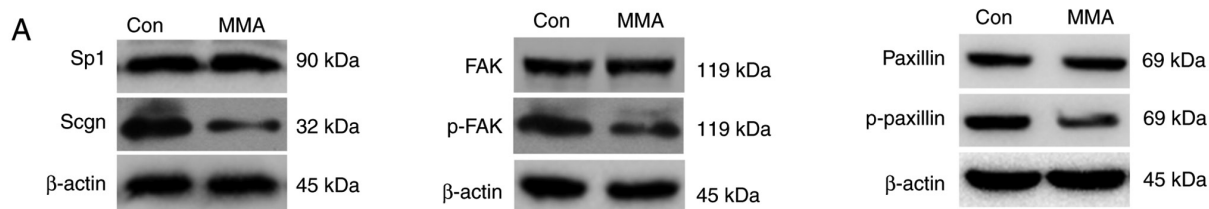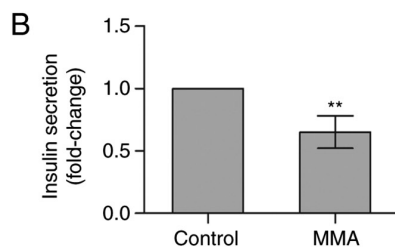

Table SI. List of the online databases used for bioinformatics analysis.

| Database   | Websites                                                                                                                                                       |
|------------|----------------------------------------------------------------------------------------------------------------------------------------------------------------|
| miRBase    | <a href="http://www.mirbase.org/search.shtml">www.mirbase.org/search.shtml</a>                                                                                 |
| TargetScan | <a href="http://www.targetscan.org">www.targetscan.org</a>                                                                                                     |
| miRanda    | <a href="http://www.microrna.org/microrna/home.do">www.microrna.org/microrna/home.do</a>                                                                       |
| RNAhybrid  | <a href="http://bibiserv.techfak.uni-bielefeld.de/rnahybrid/submission.html">bibiserv.techfak.uni-bielefeld.de/rnahybrid/submission.html</a>                   |
| PROMO      | <a href="http://alggen.lsi.upc.es/cgi-bin/promo_v3/promo/promoinit.cgi?dirDB=TF_8.3/">alggen.lsi.upc.es/cgi-bin/promo_v3/promo/promoinit.cgi?dirDB=TF_8.3/</a> |
| Tfsitescan | <a href="http://www.bitnos.com/info/tfsitescan-promoter-sequence-analysis">www.bitnos.com/info/tfsitescan-promoter-sequence-analysis</a>                       |
| DBD        | <a href="http://www.transcriptionfactor.org">www.transcriptionfactor.org</a>                                                                                   |
